# Supplementary material for: Structural insights into the substrate specificity of the endonuclease activity of the influenza virus cap-snatching mechanism
Source: PubMed Central journal article supplement — Nucleic Acids Res. 2021 Jan 19;49(3):1609–18. doi: 10.1093/nar/gkaa1294 (PMC7897473; doi:10.1093/nar/gkaa1294), 2021-01-19

**Supplementary Figure S1.** Superposition of the oligonucleotides bound to the  $PA_N$  endonuclease. In all figures, only those nucleotides that occupy the **P-1**, **P0**, **P1** and **P2** sites in the four complexes are shown. (A) The four superimposed sugar-phosphate backbones. (B-D) The RNA oligomer AG\*CA (where \* indicates the location of the uncleavable sulfate linkage and the underlined nucleotides are those that occupy the four sites) superimposed on (B) DNA oligomer TAGCAT, (C) DNA oligomer TAGC and (D) DNA oligomer TGAGC. In (B-D), the common structure is the RNA complex as shown in Figure 1A. In (C) and (D), only three DNA nucleotides are shown because the **P-1** site is empty in both; it is missing in the 'cleaved' complex (C) or is part of the partially dissociated 5' dinucleotide in the 'product' structure (D). This also explains why the **P-1** site in (A) only contains two superimposed ribose-phosphate moieties. RNA is colored with orange carbons, DNA is colored with magenta carbon bonds, and  $PA_N$  and key residues are colored cyan (as in Figure 1A). The key residues are labeled in (B). Note that the RNA and DNA sugar-phosphate backbones align well within their pockets, but the orientations of the bases are more variable.

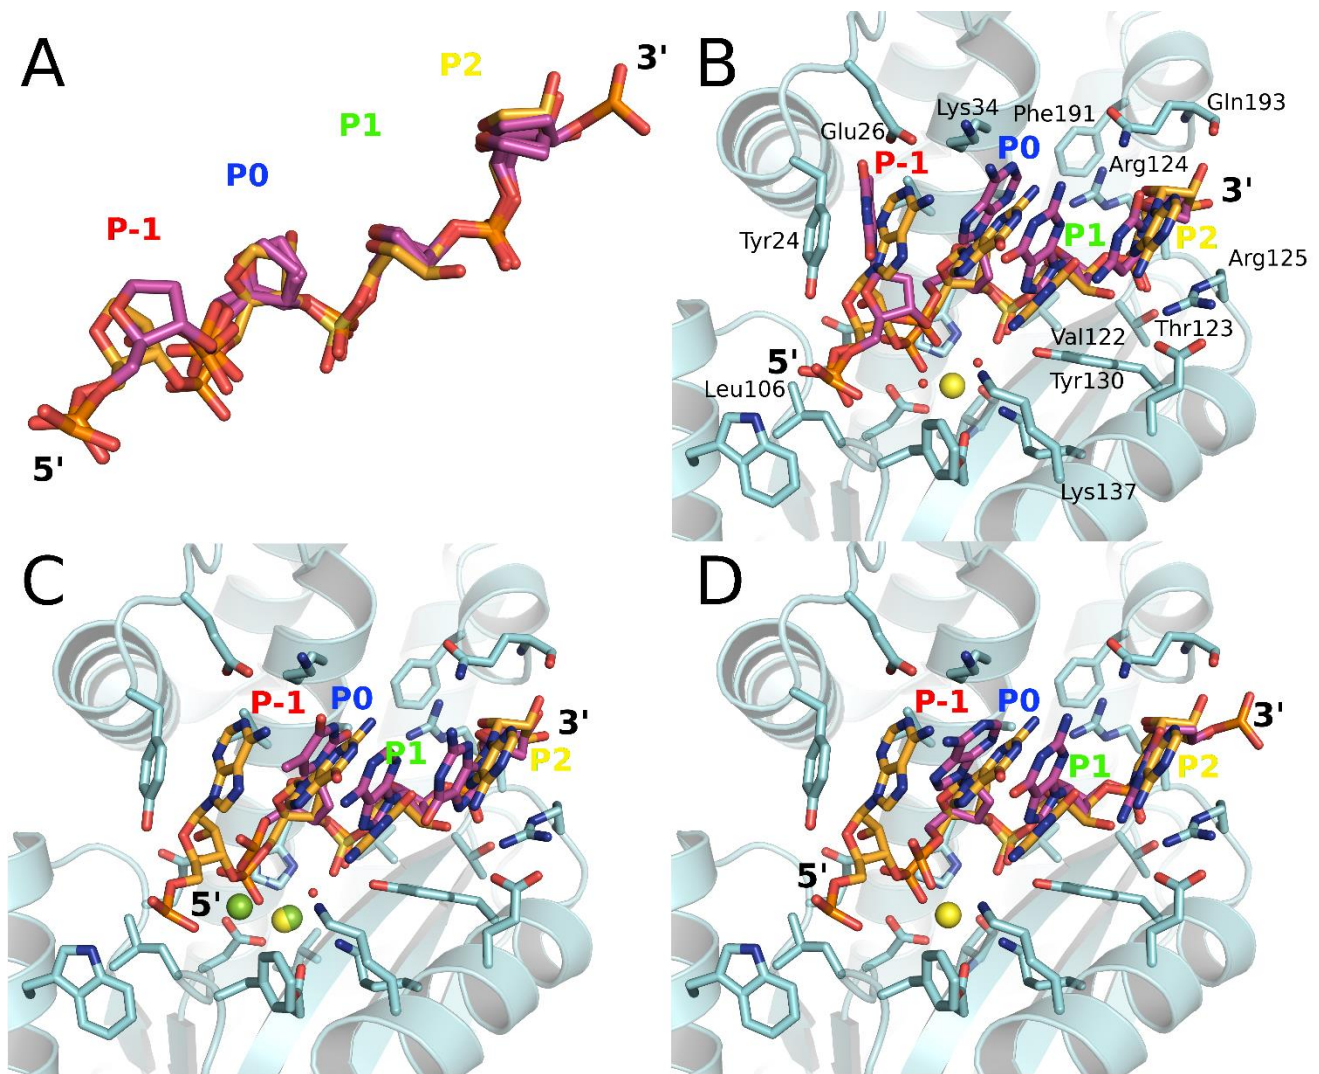

Supplement: gkaa1294_supplemental_file.pdf [file gkaa1294_supplemental_file.pdf]
